# Supplementary material
Source: HighWire-hosted journal article supplement (http://www.cmaj.ca/highwire/filestream/70432/field_highwire_adjunct_files/5/170914-res-6-at.pdf)

## Appendix 6 (as supplied by the authors): Calibration for sub-groups in validation data, females.

There were 115 subgroups examined. Of those subgroups, there were 96 of 97 groups that had a less than 20% difference in observed versus predicted risk at a 95% confidence interval.

\* "Vey weak" sense of belonging: 0.0232 observed versus 0.0188 predicted 5-year cardiovascular disease risk ( $p < 0.05$ ).

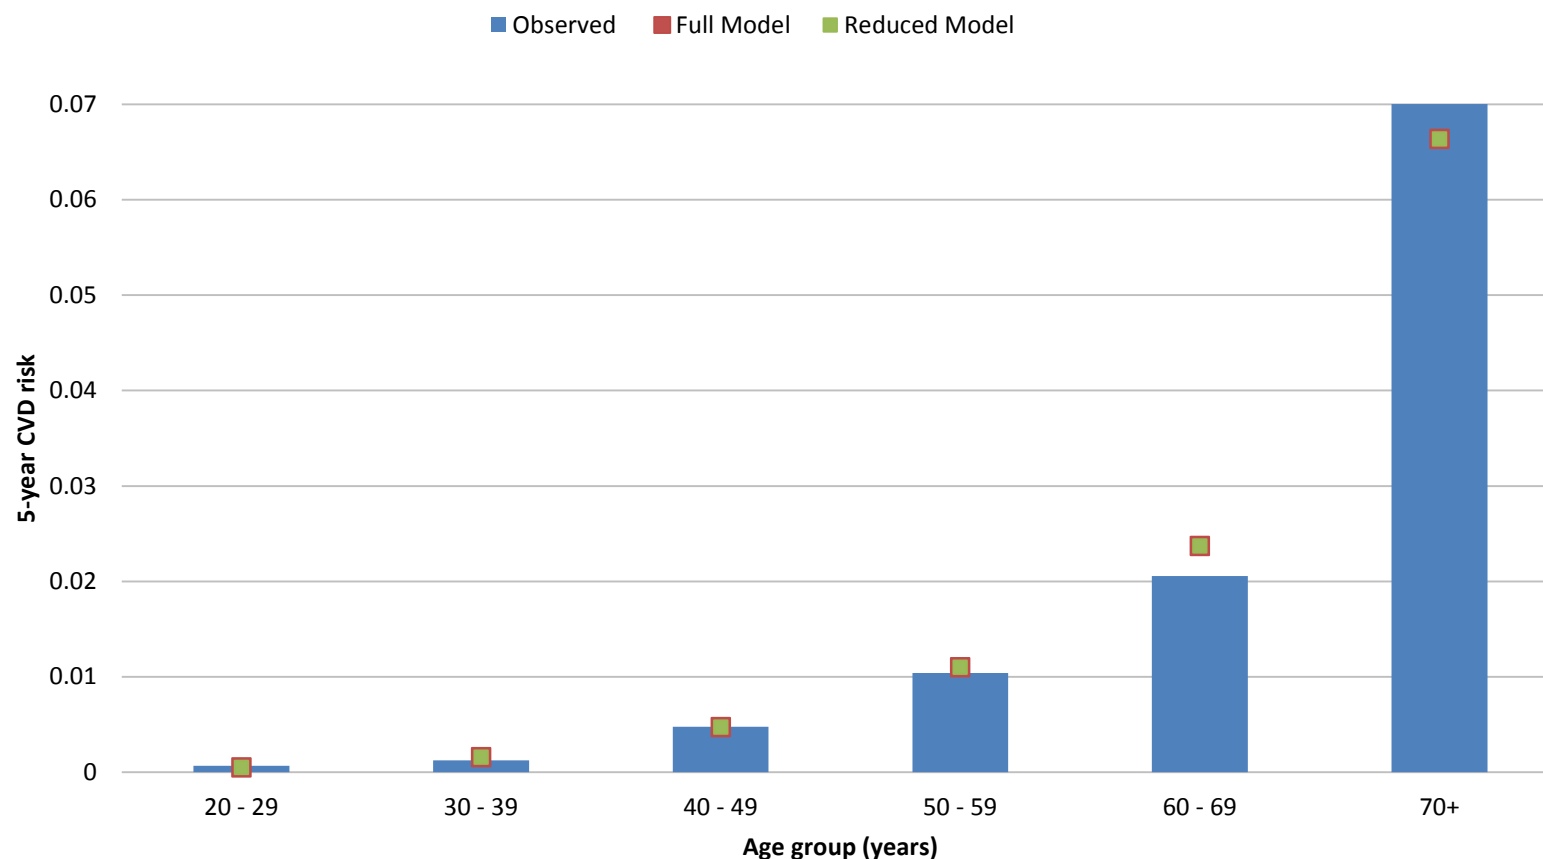

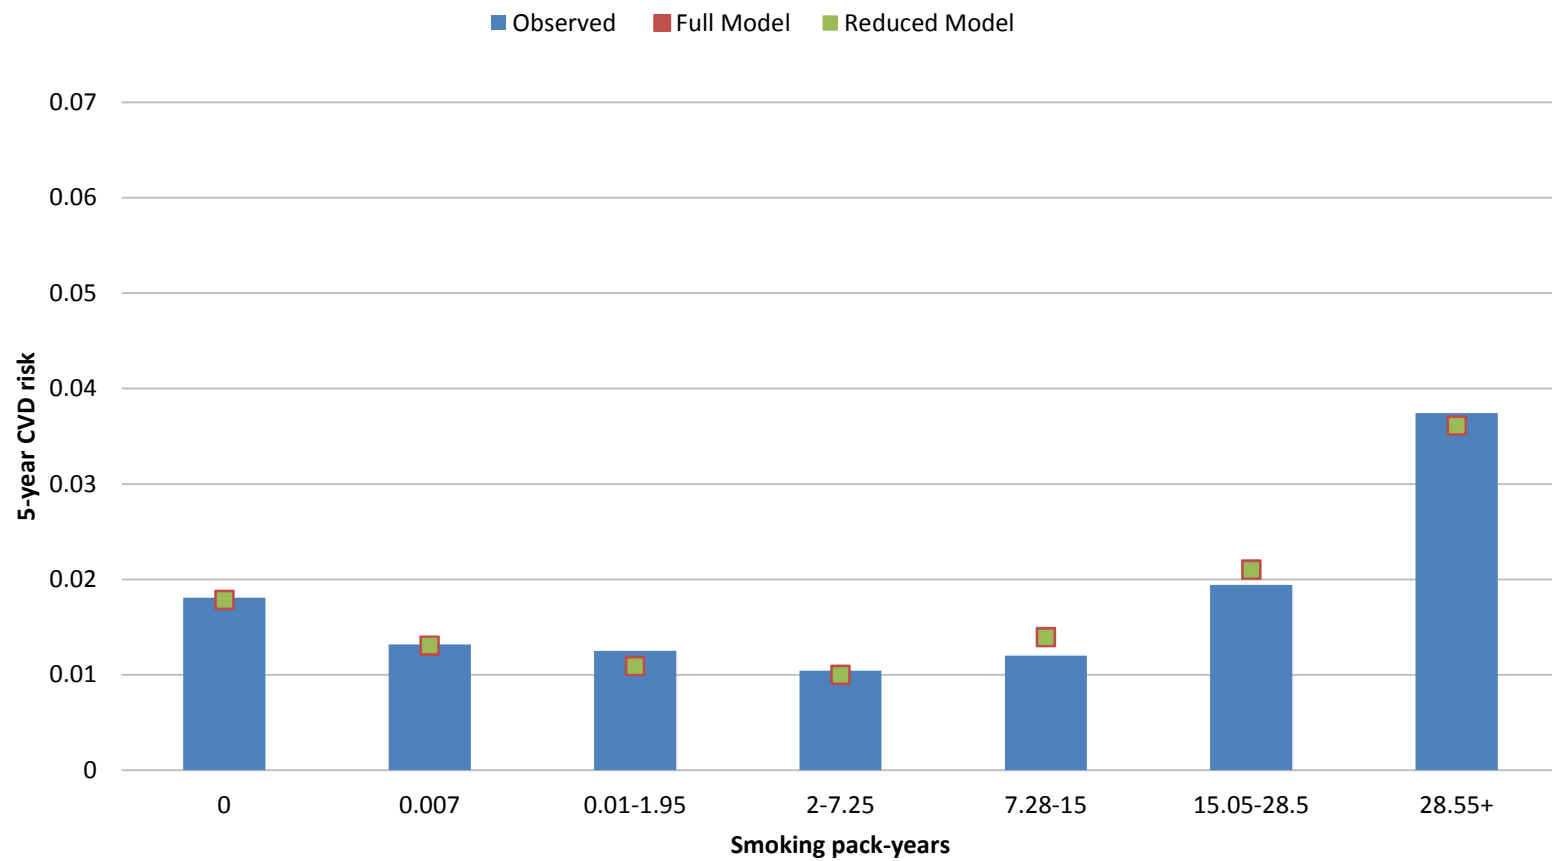

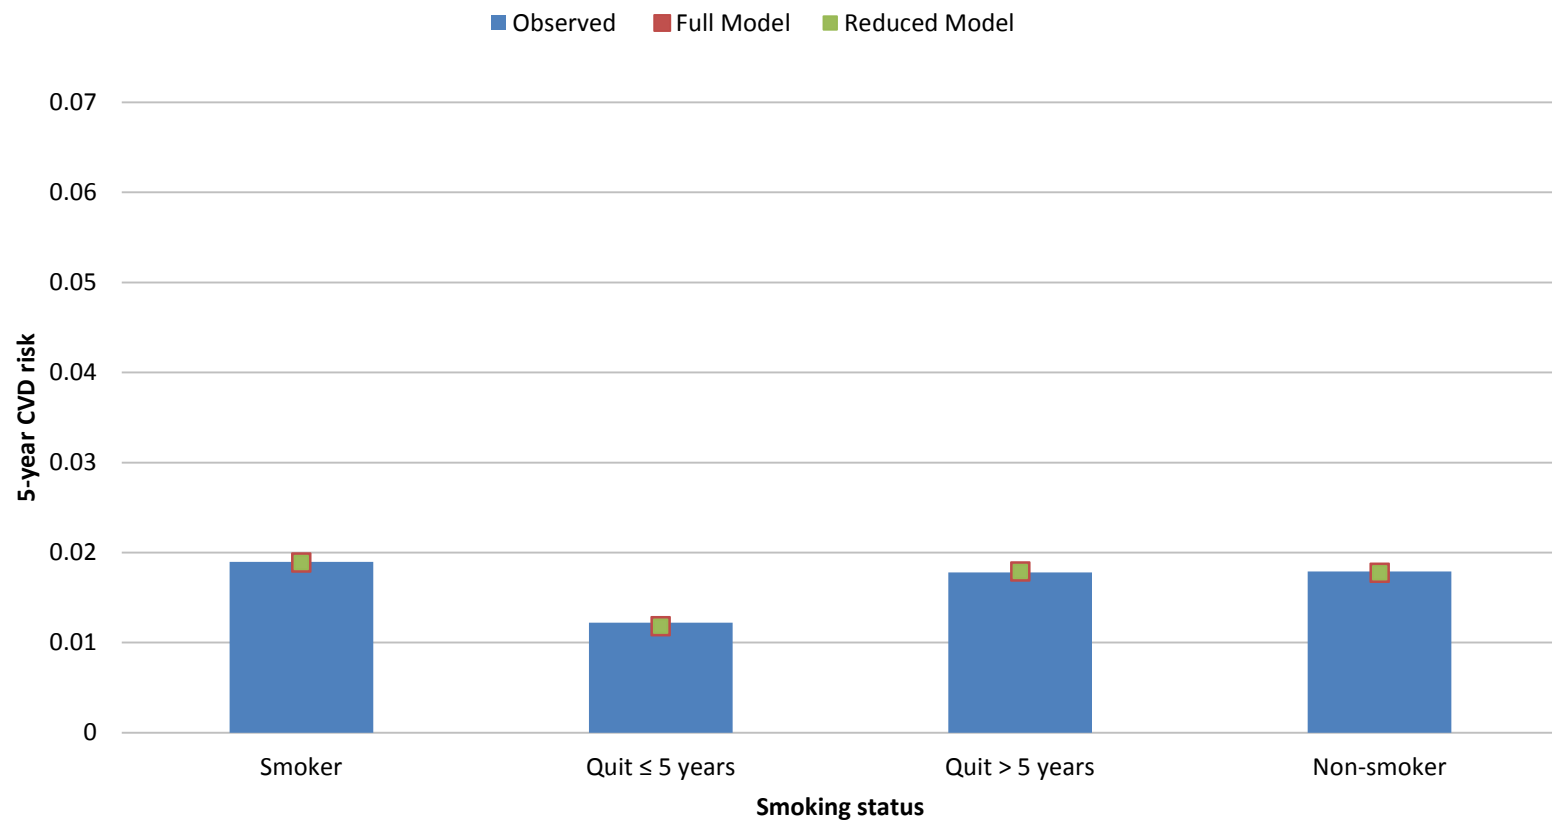

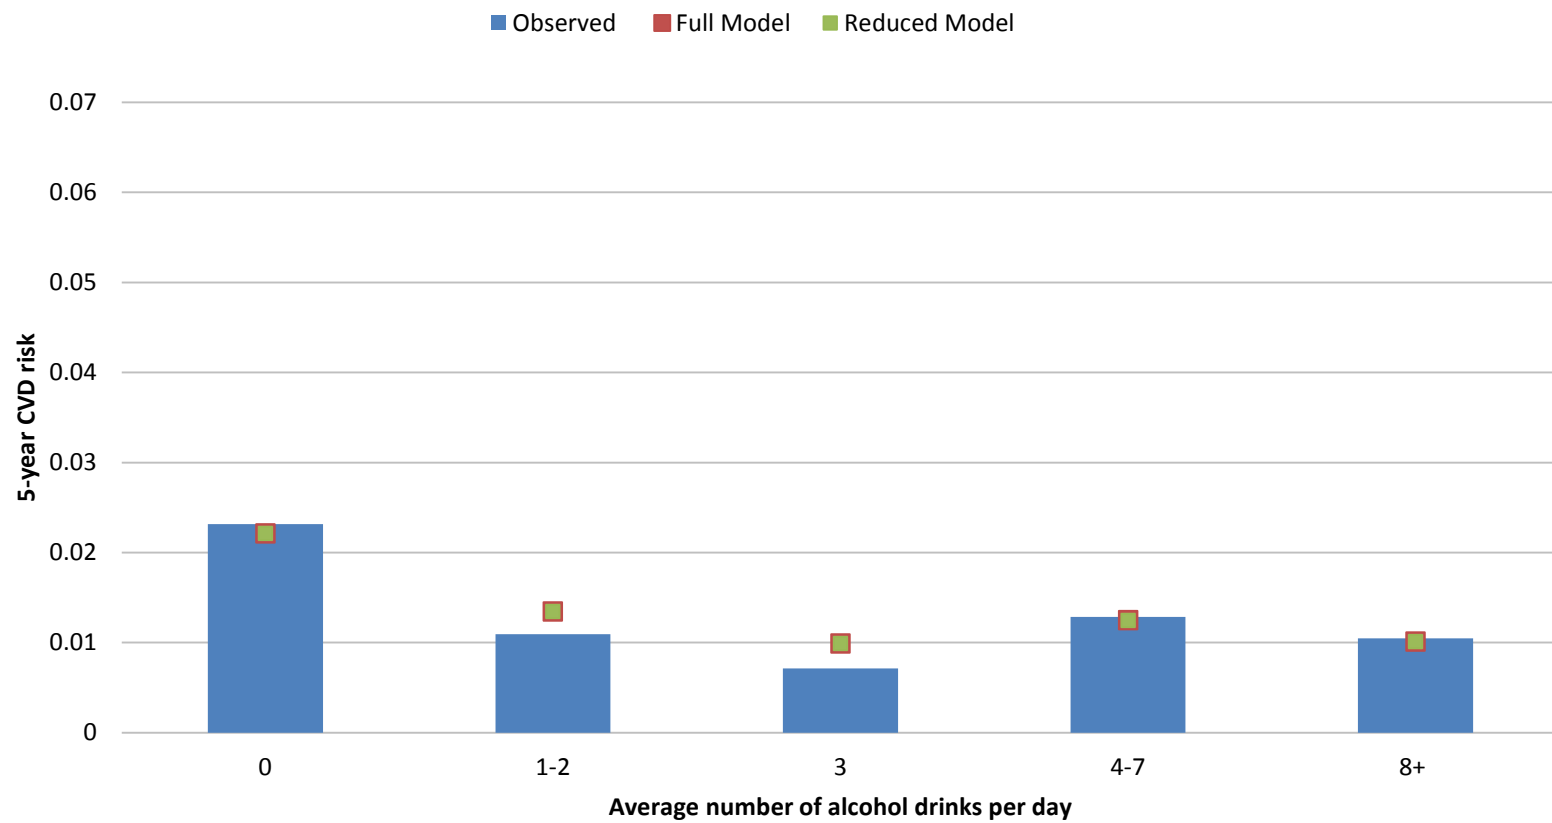

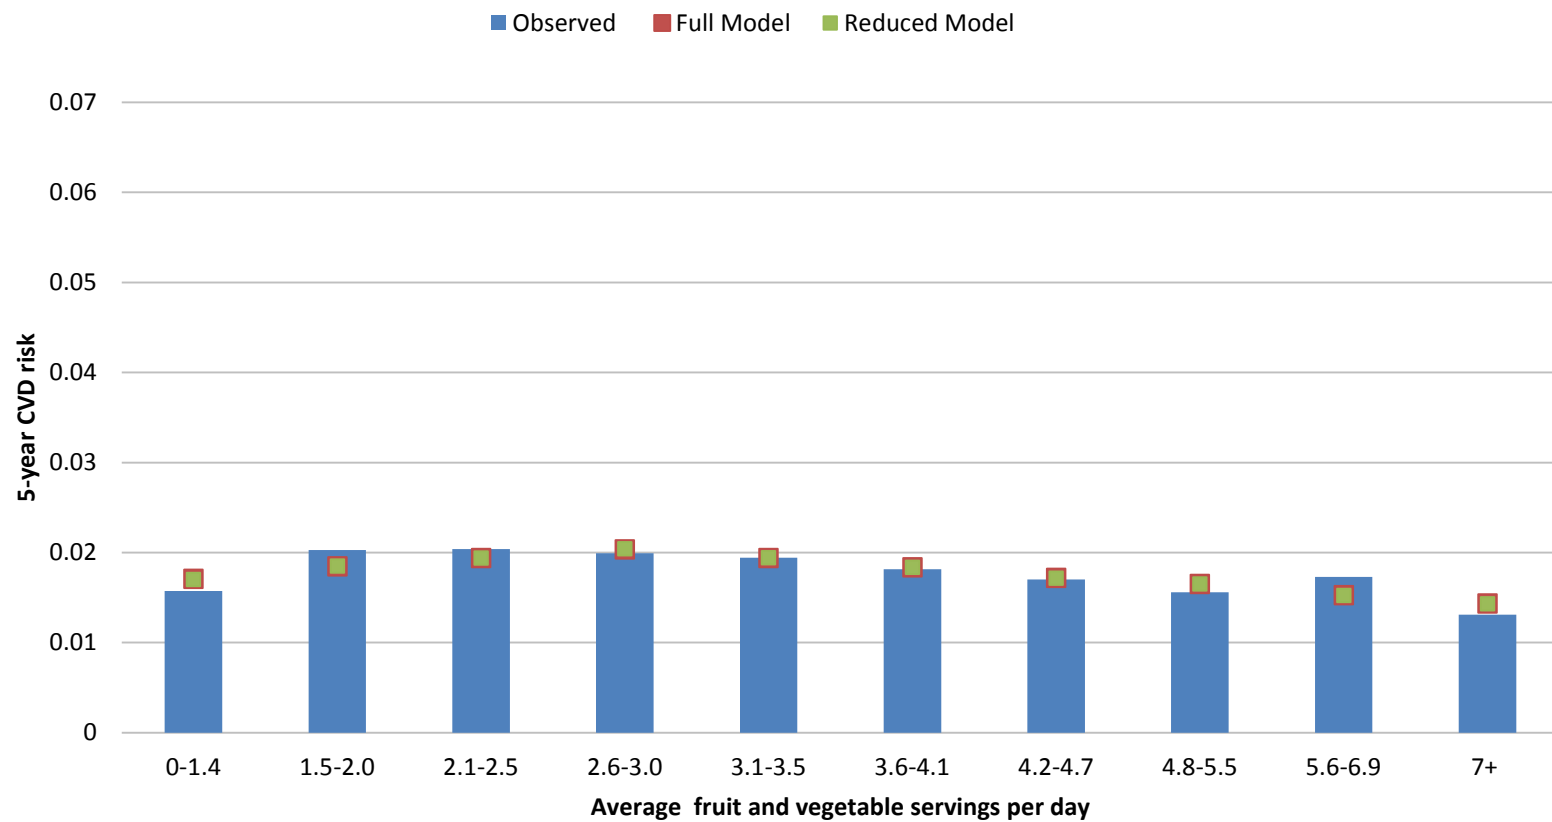

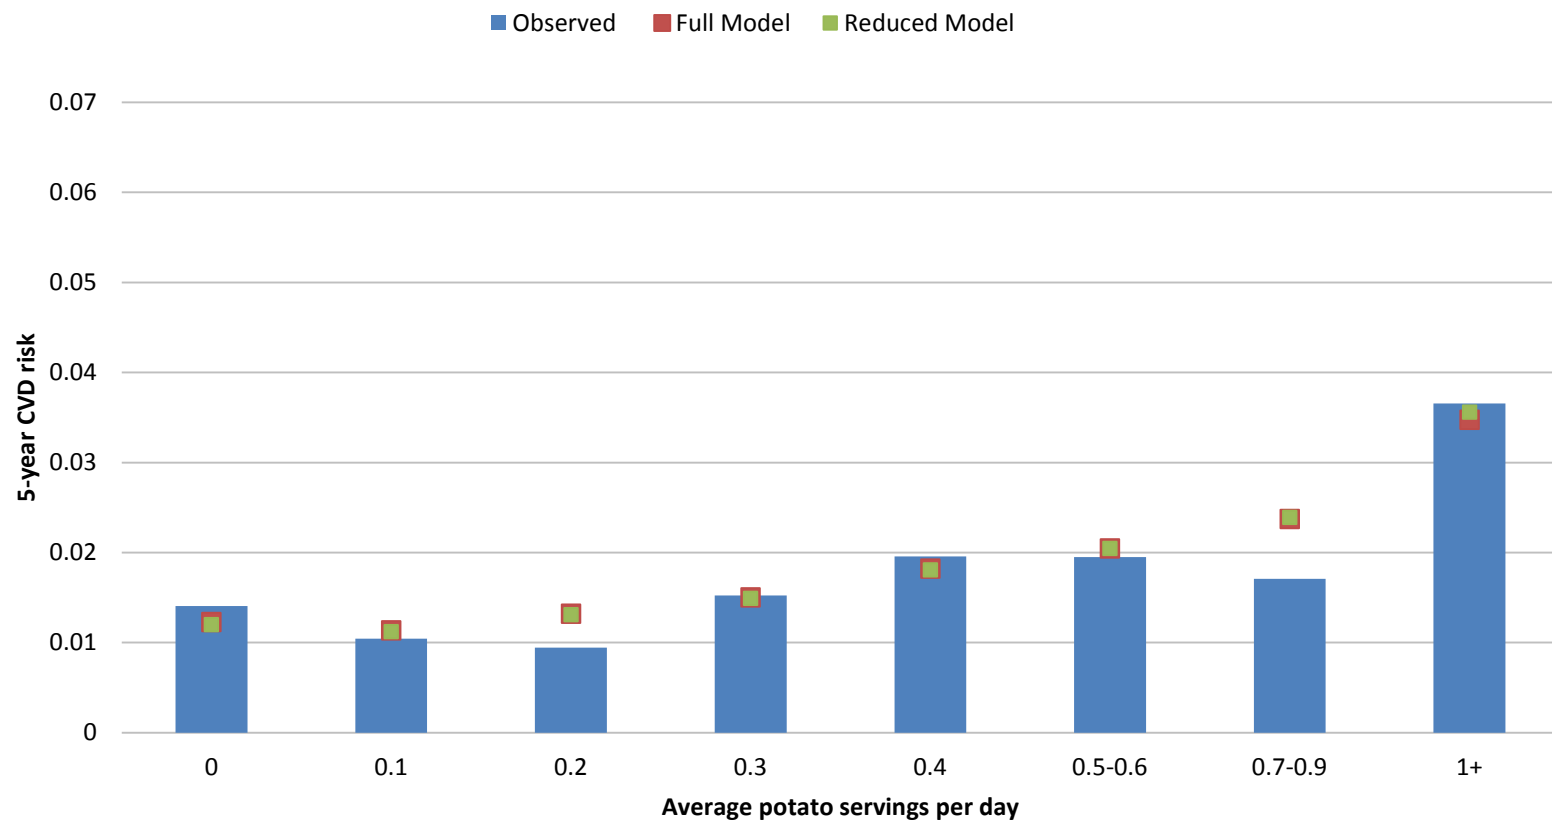

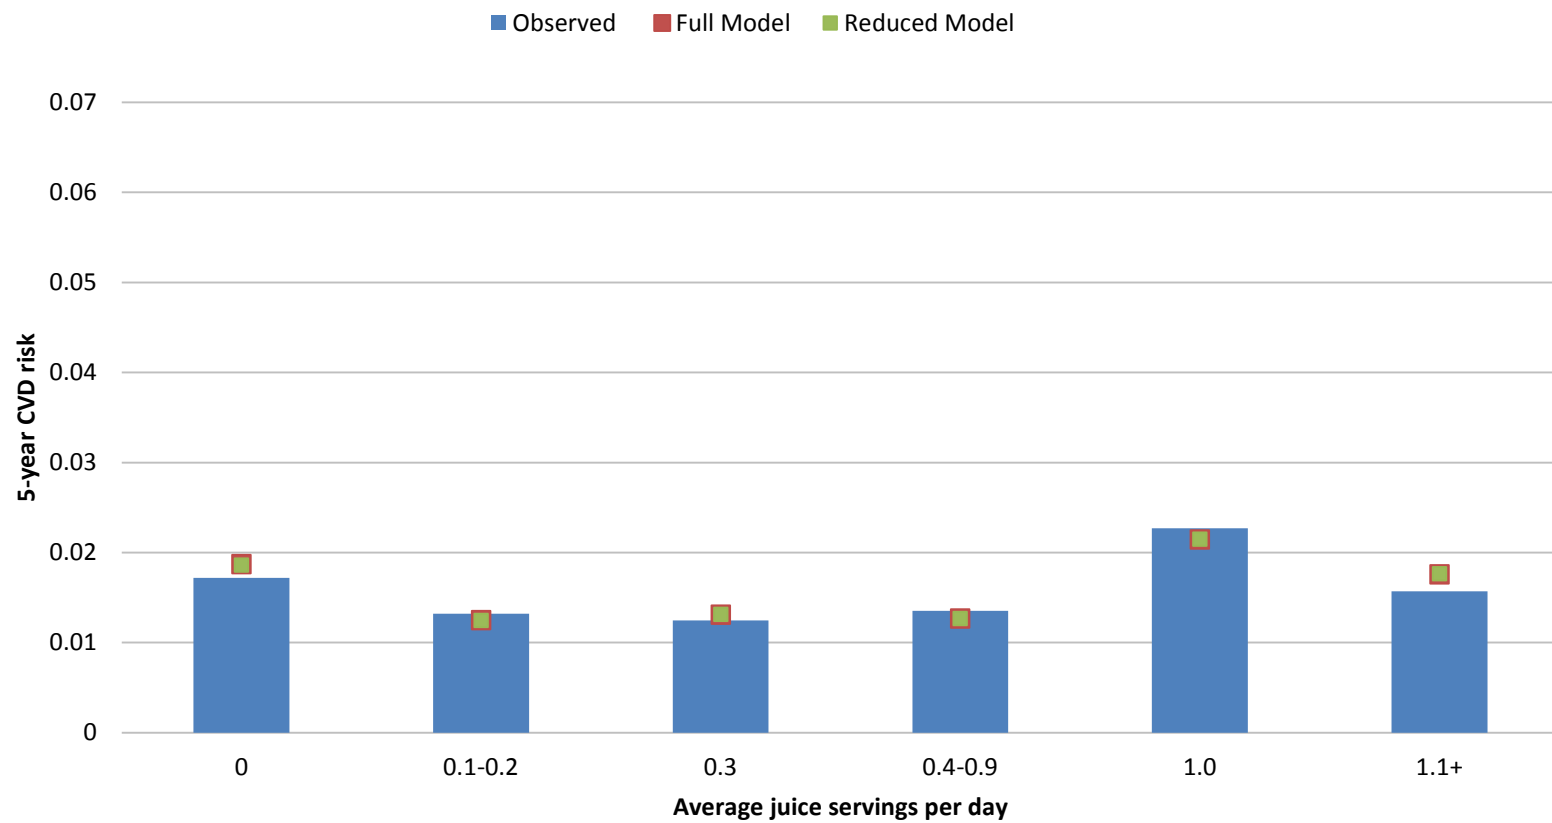

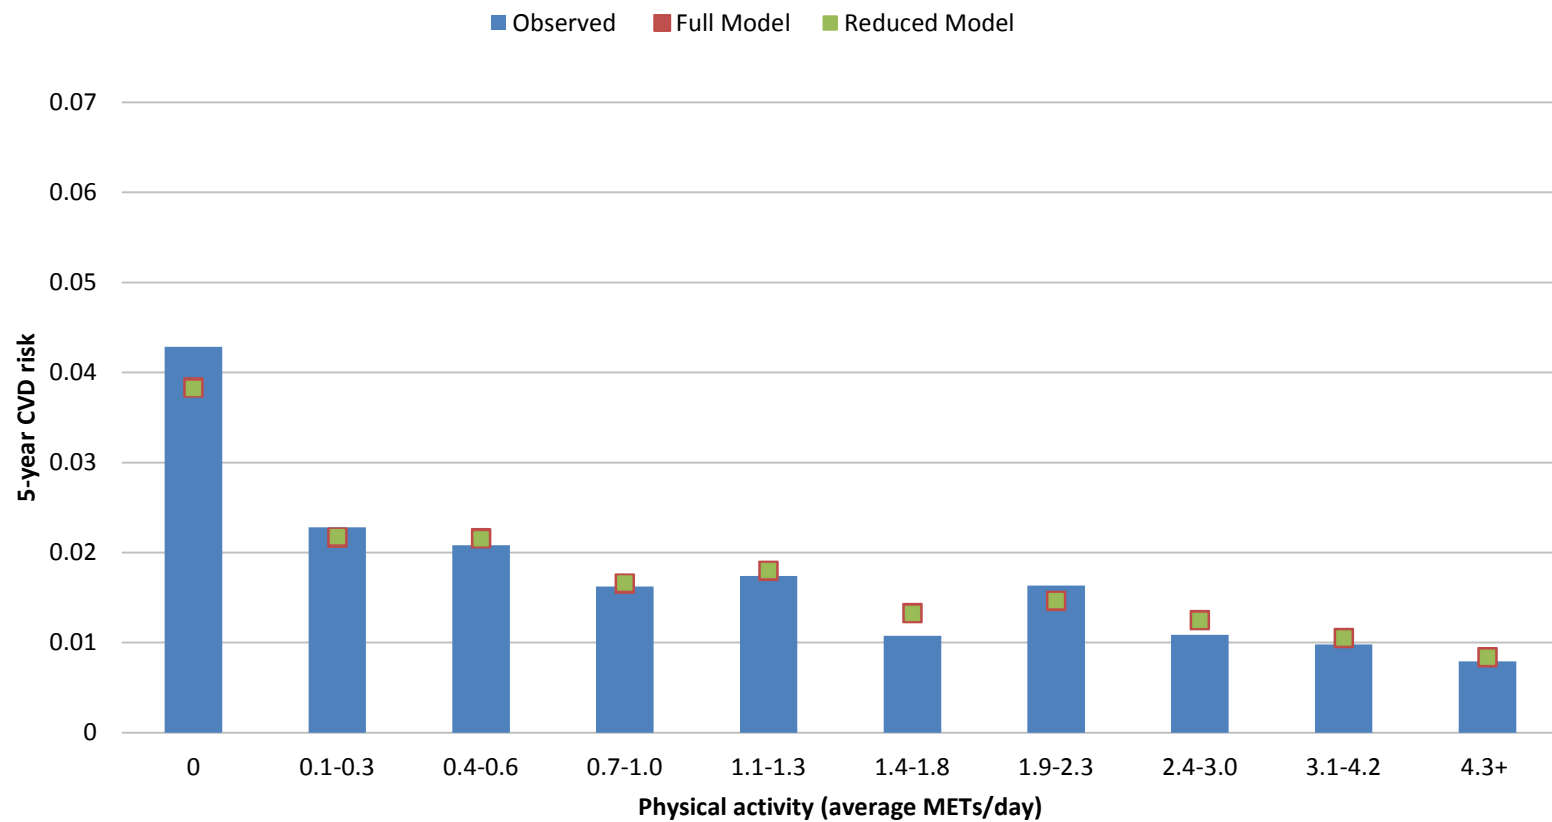



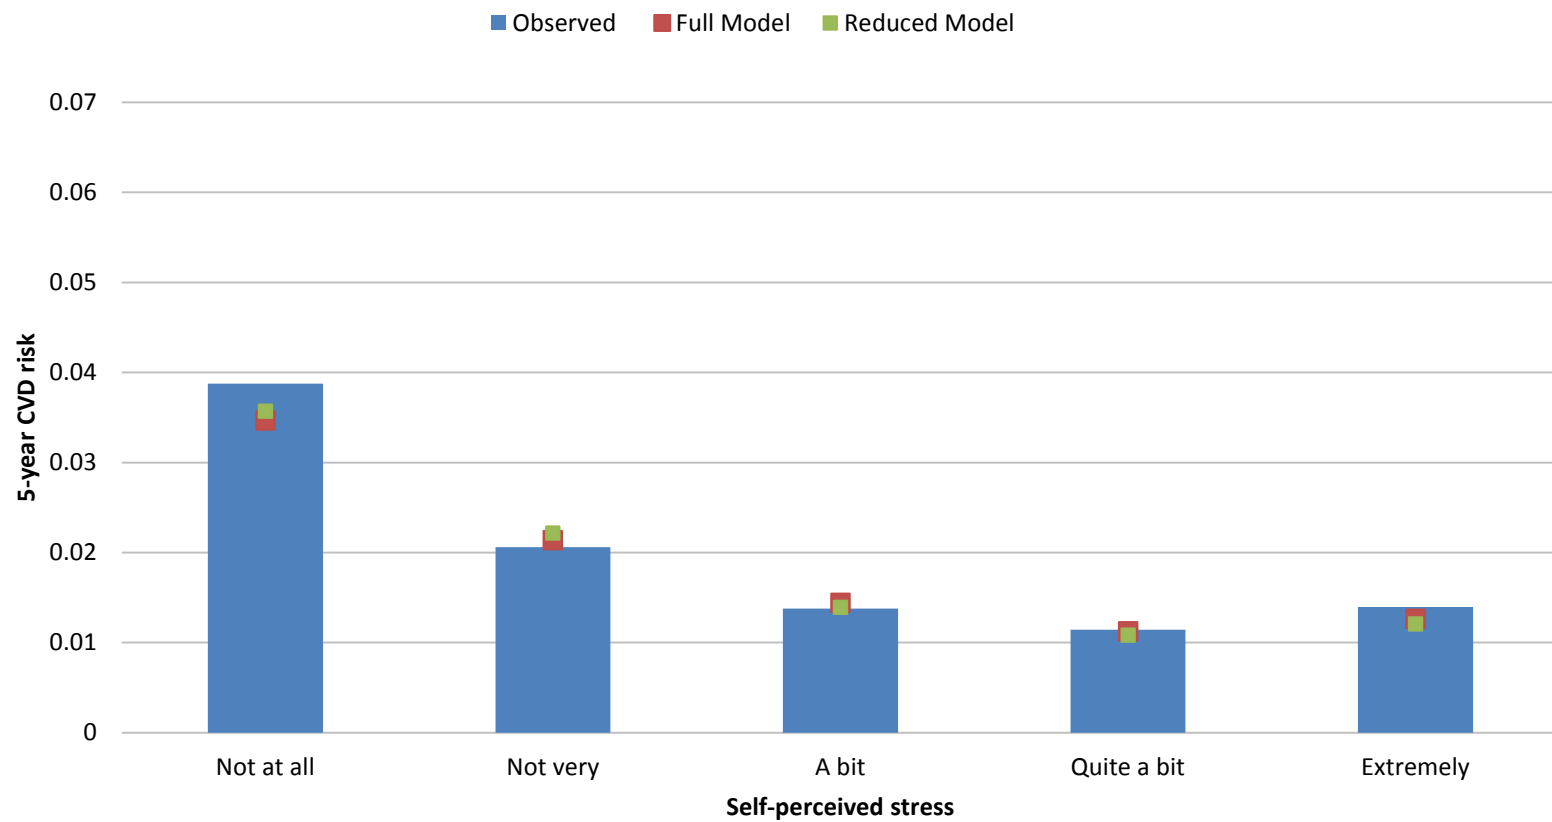

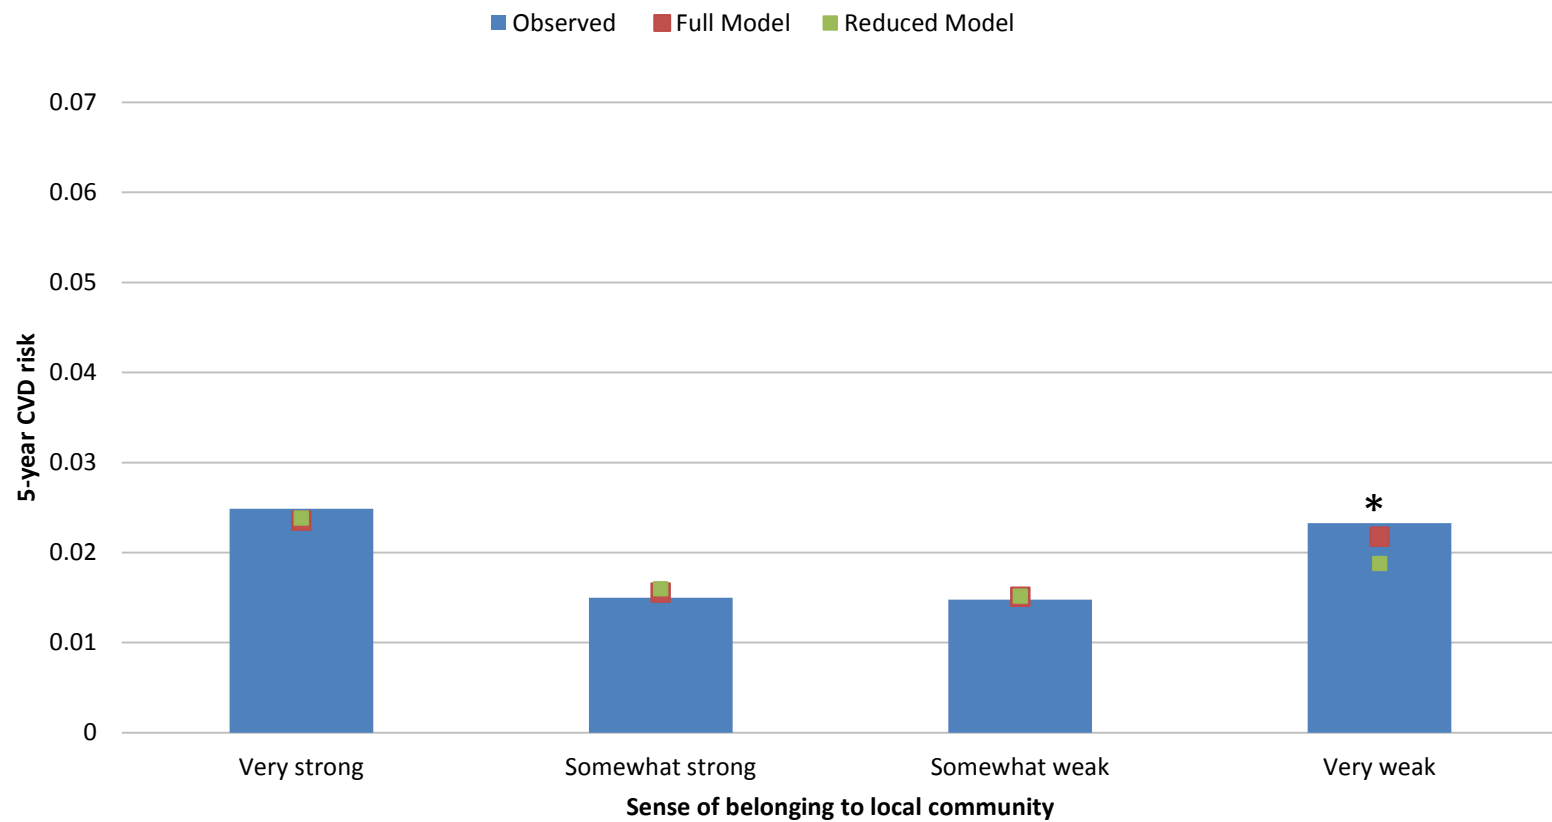

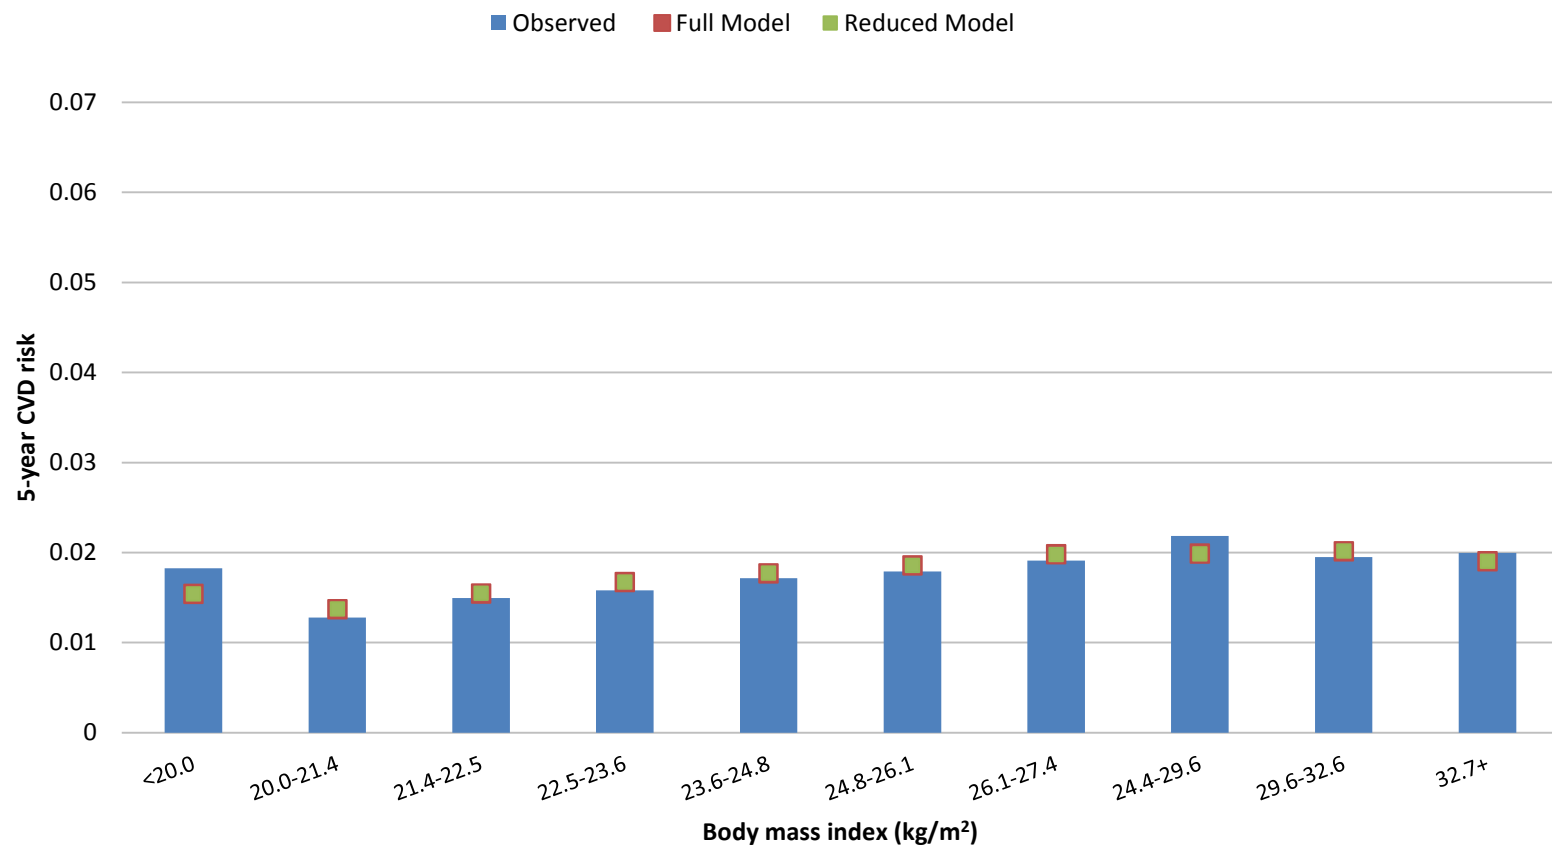

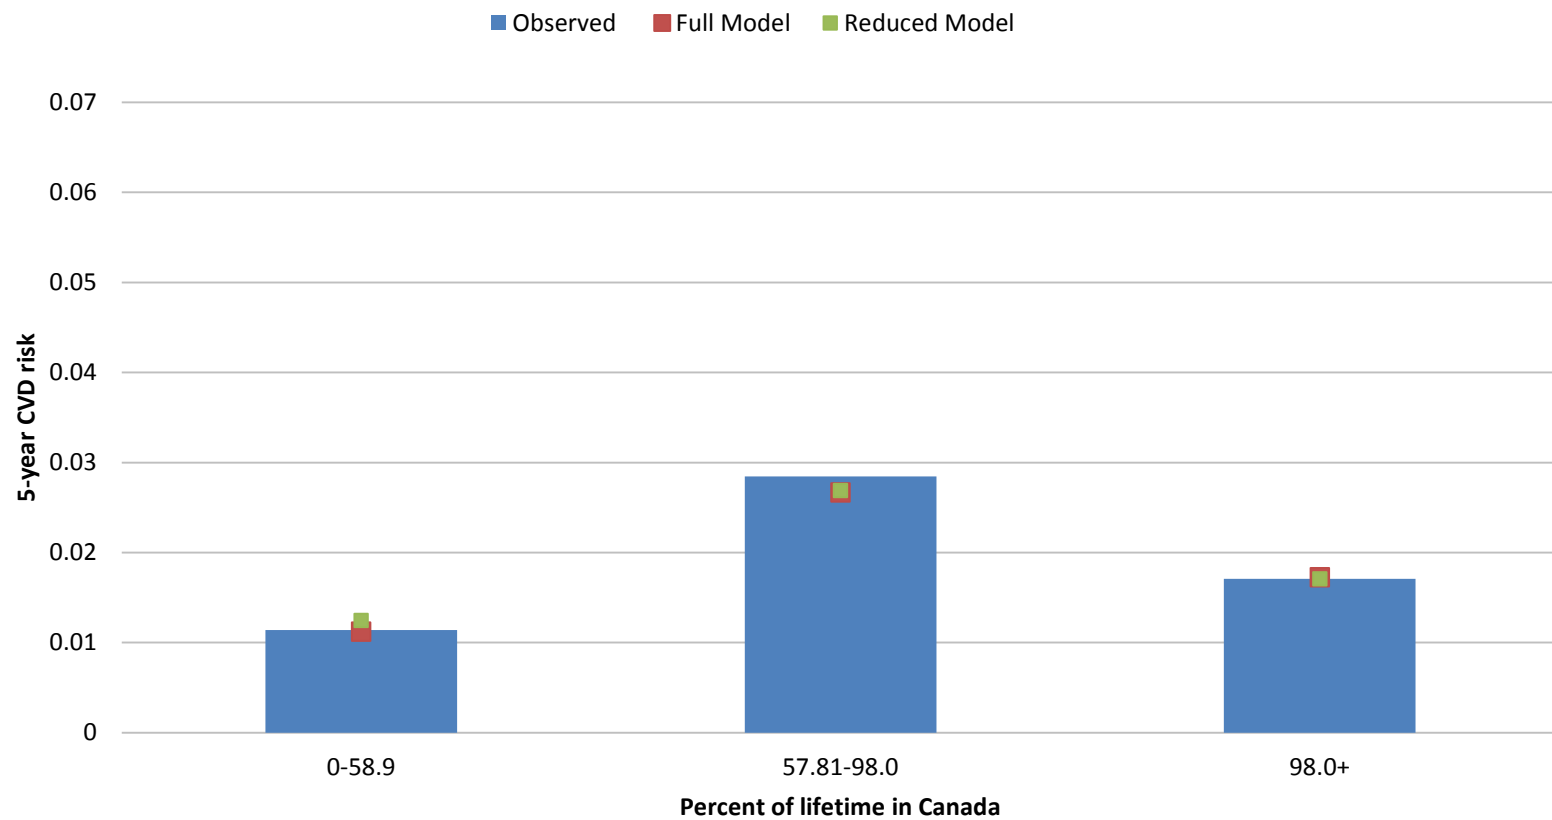

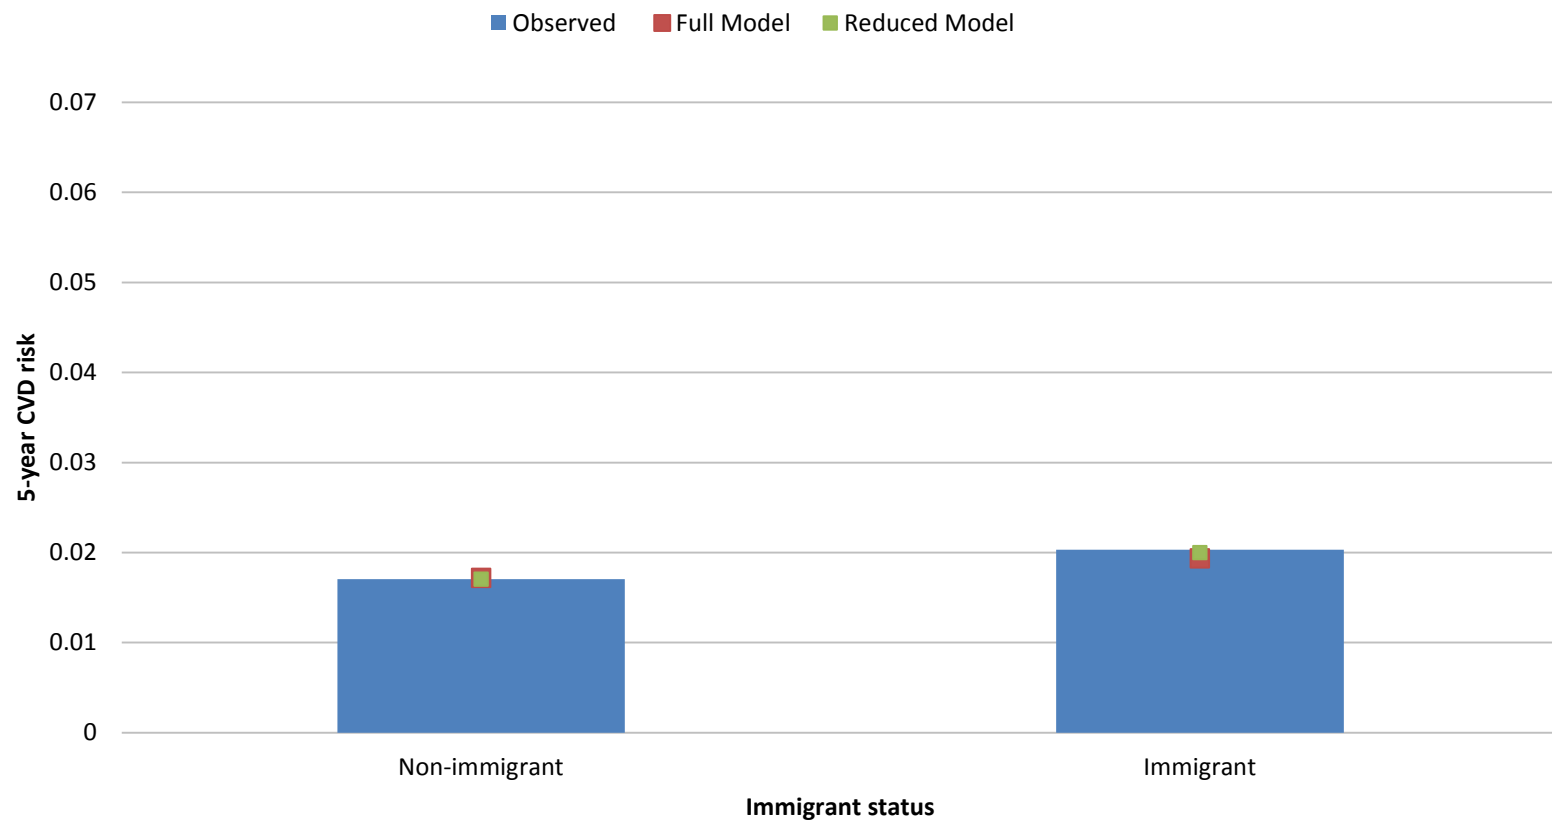

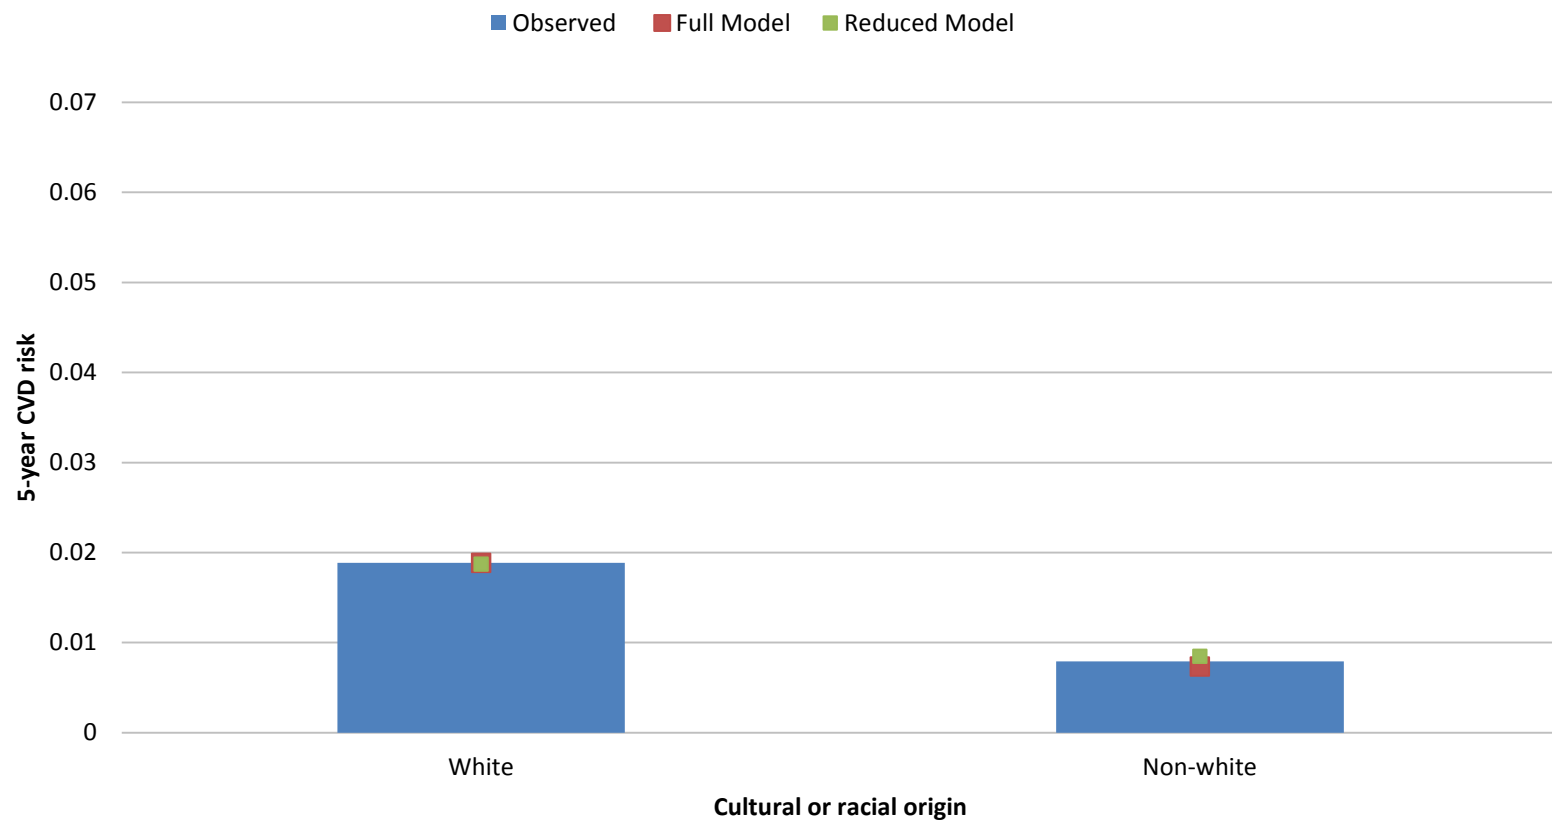

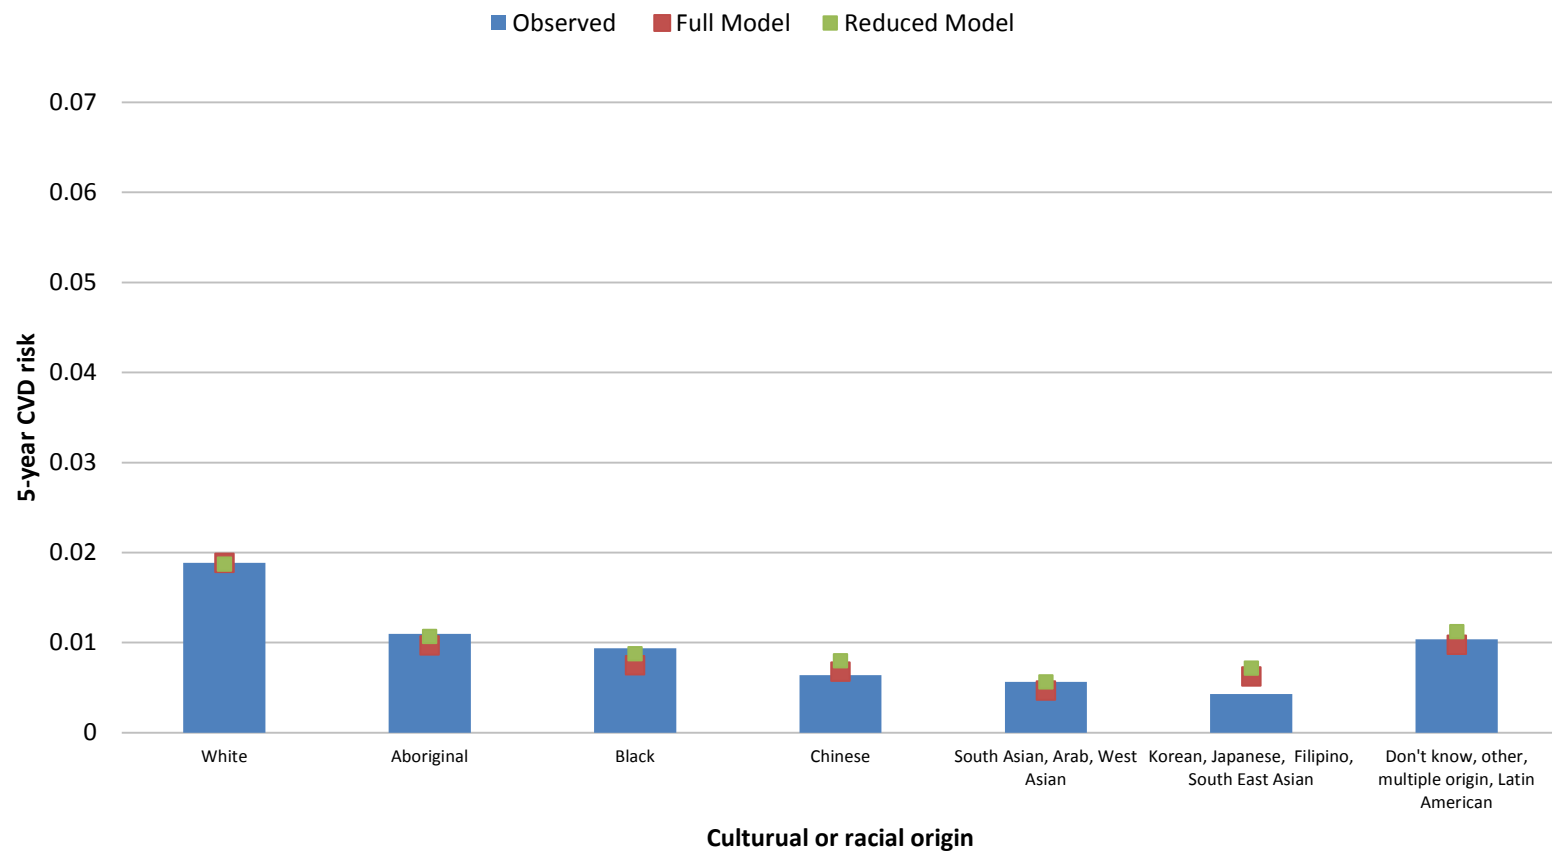

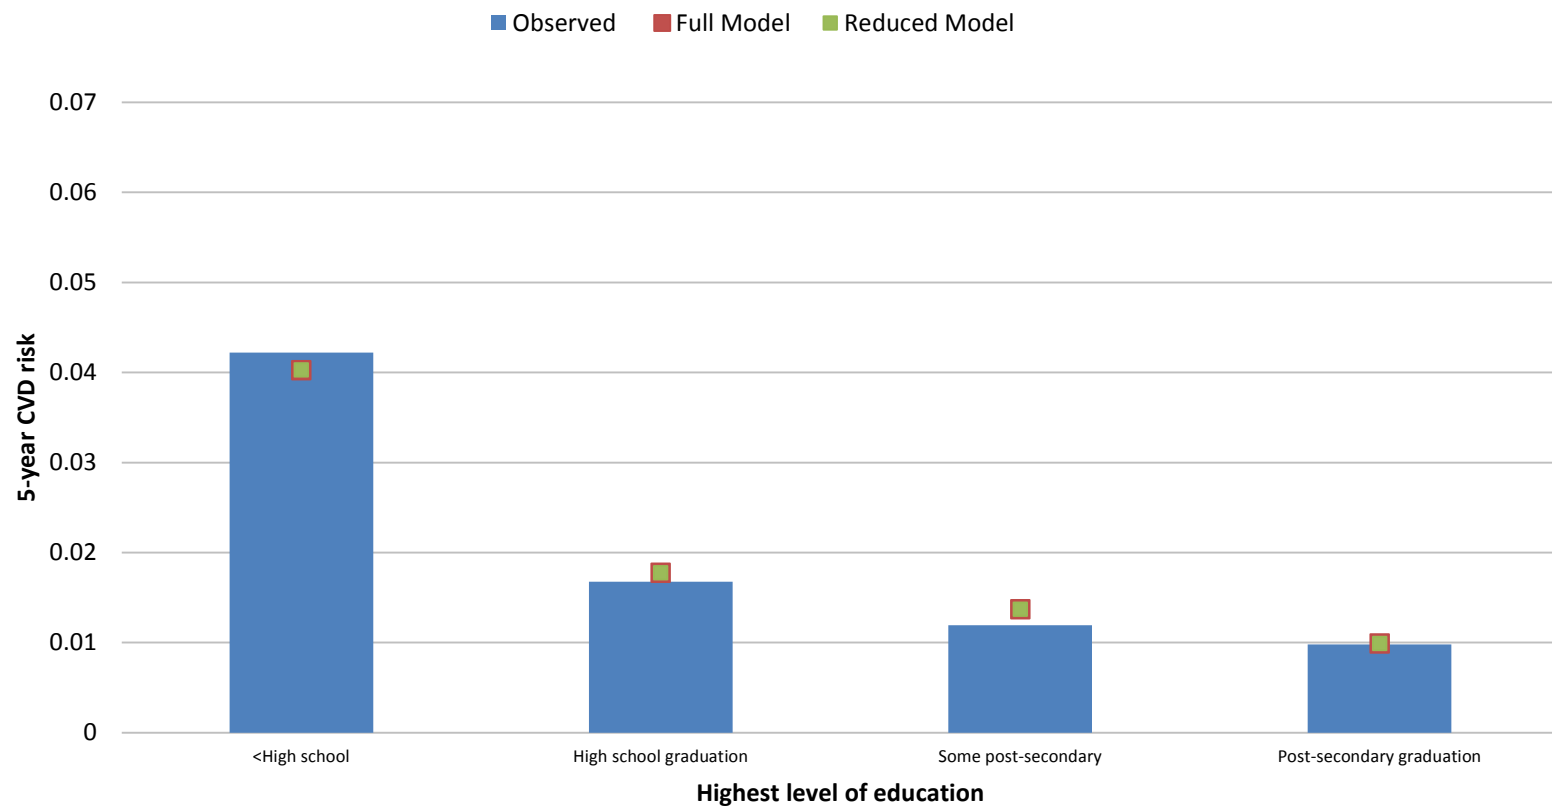



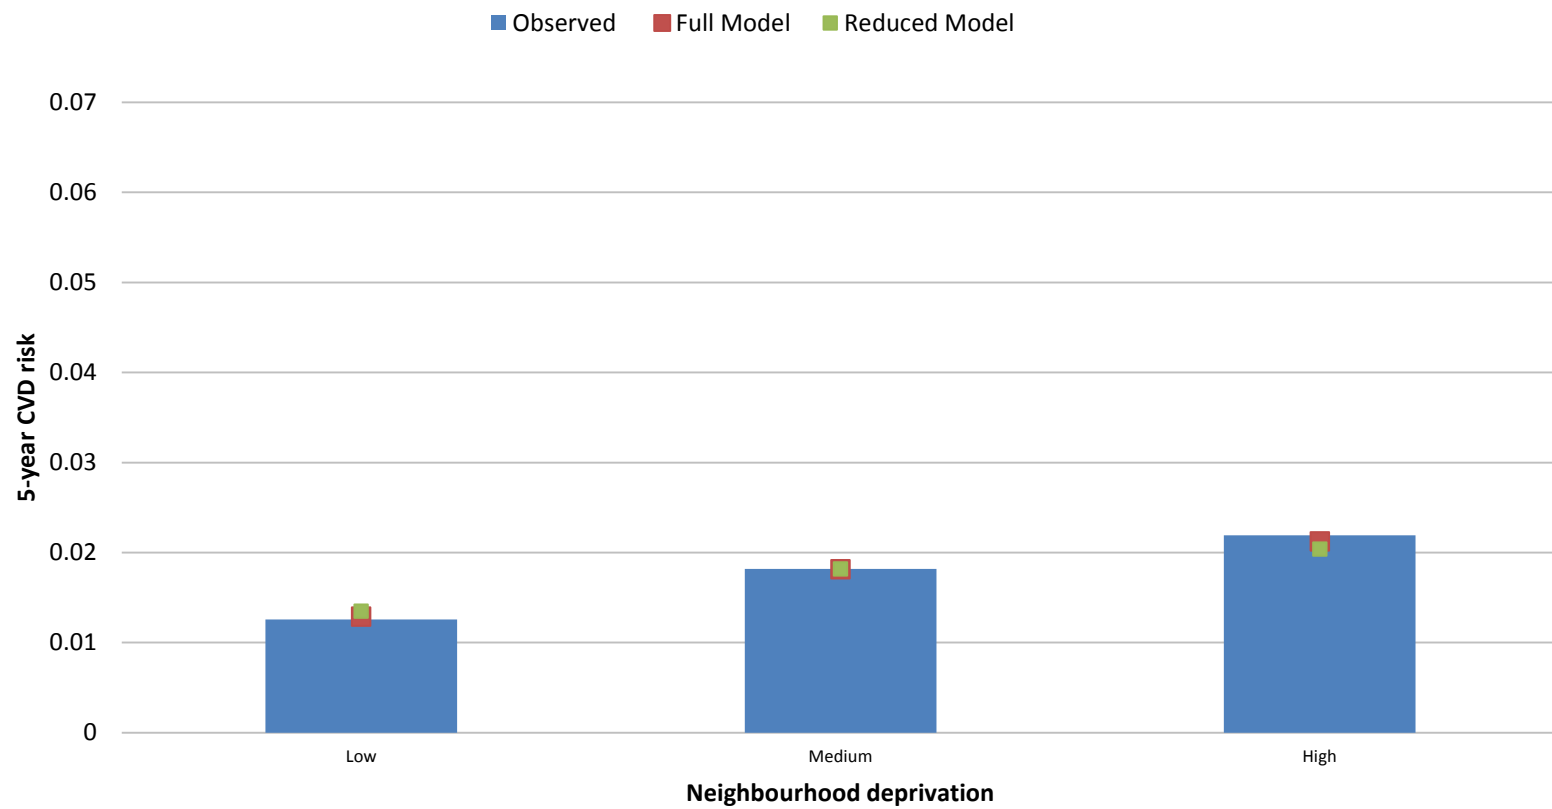

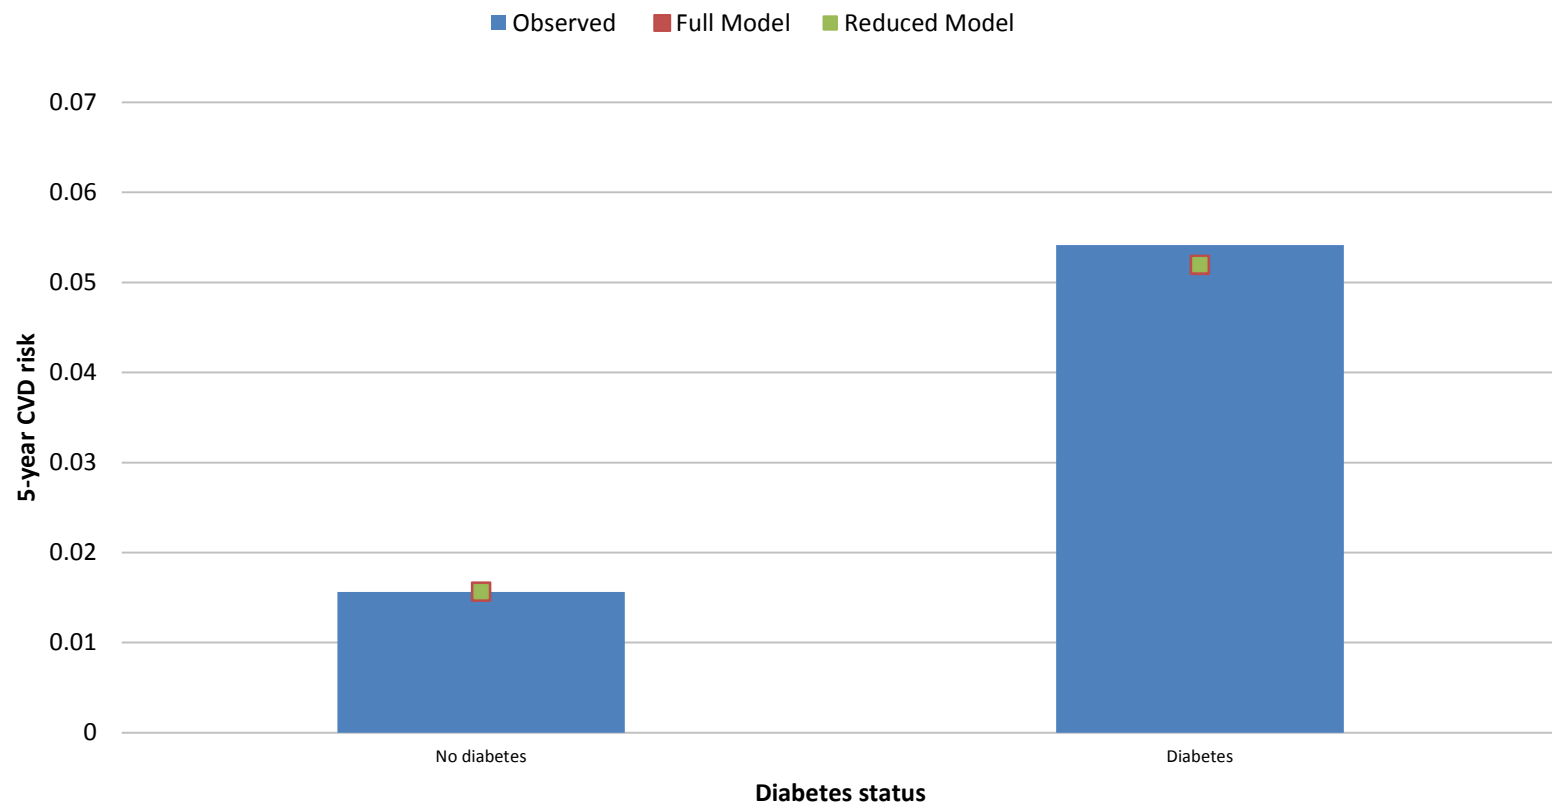

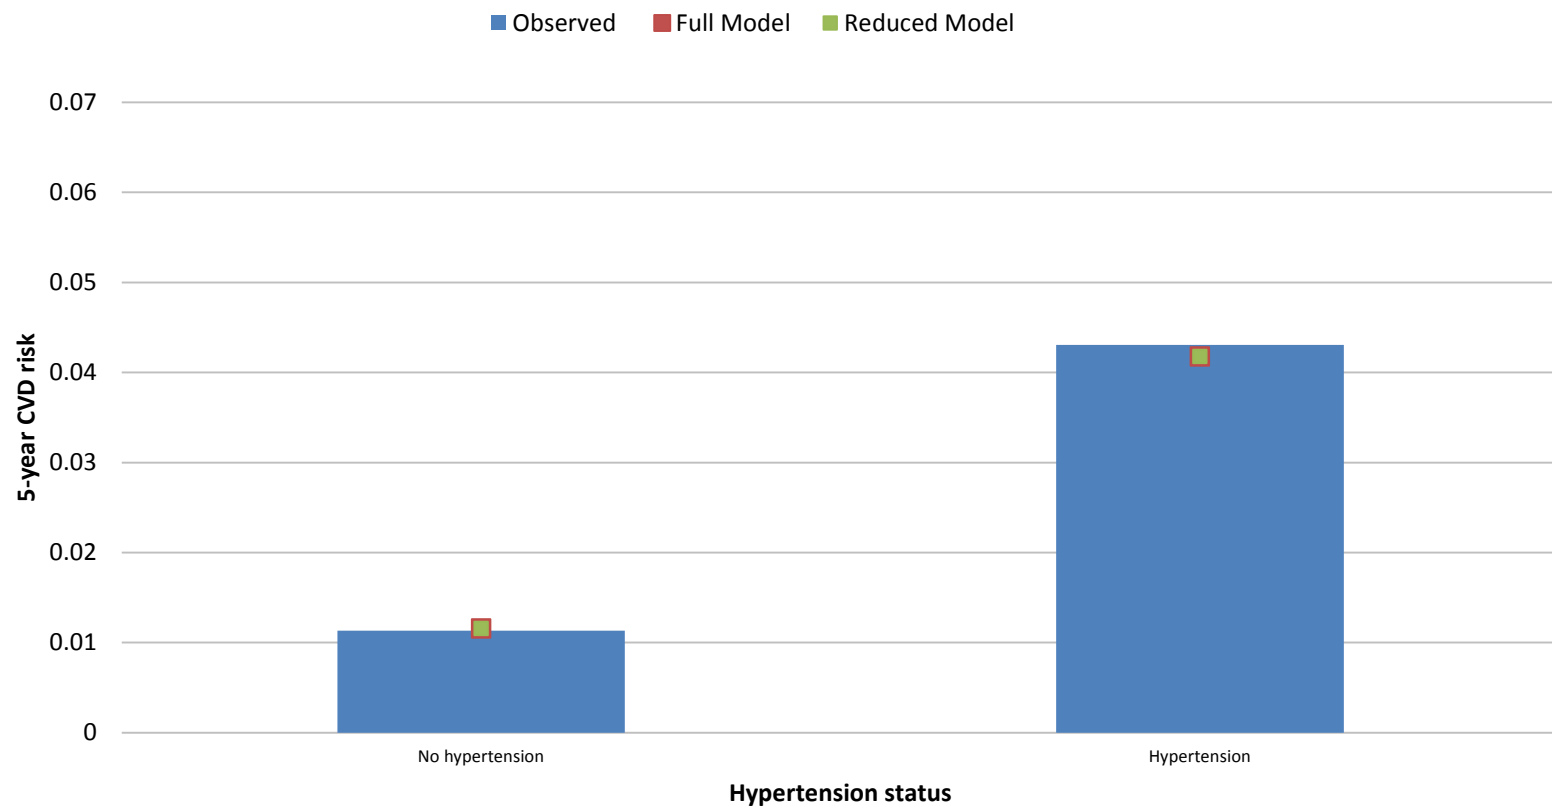

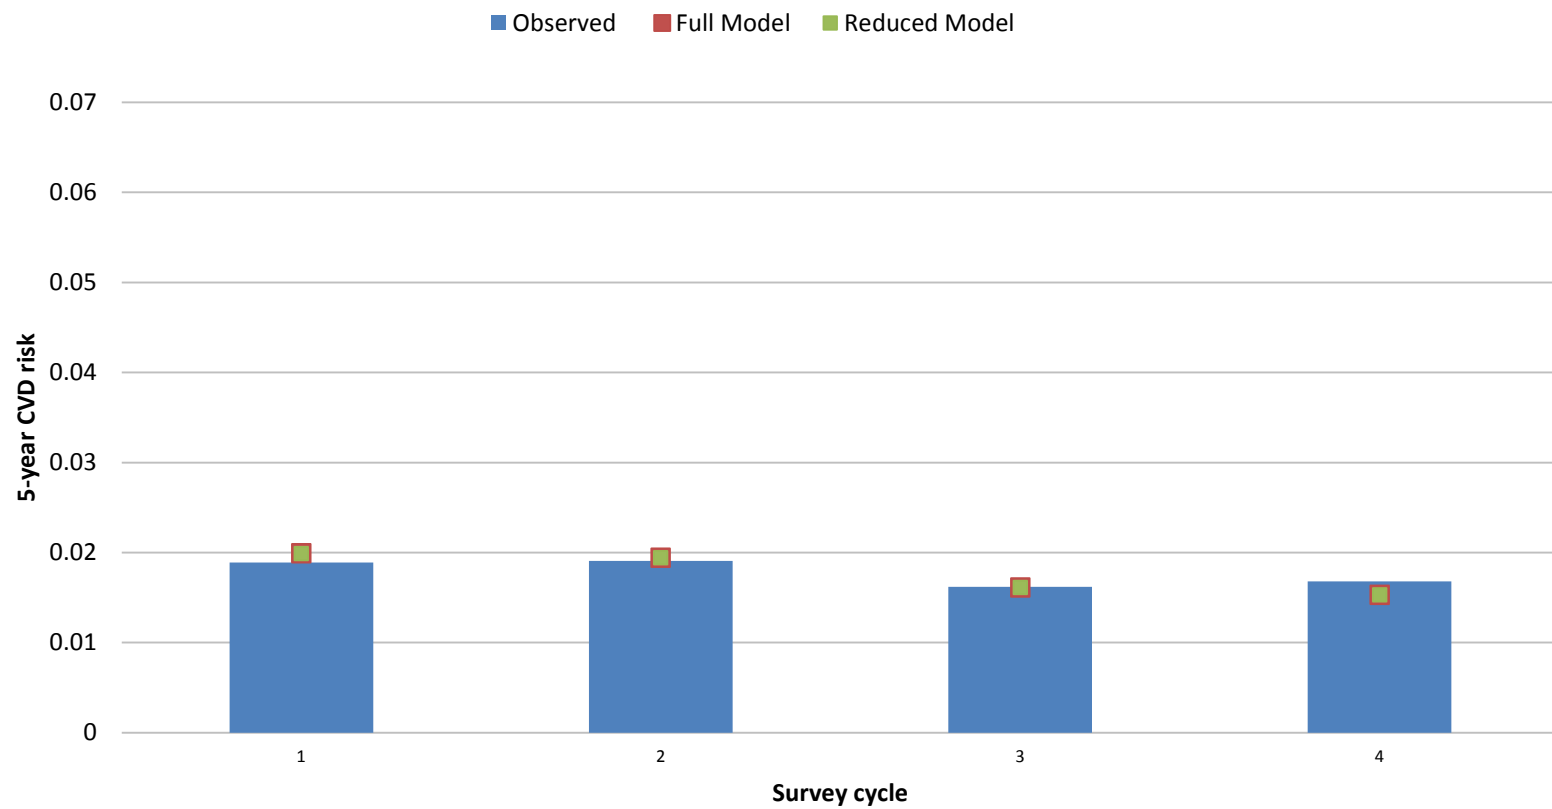

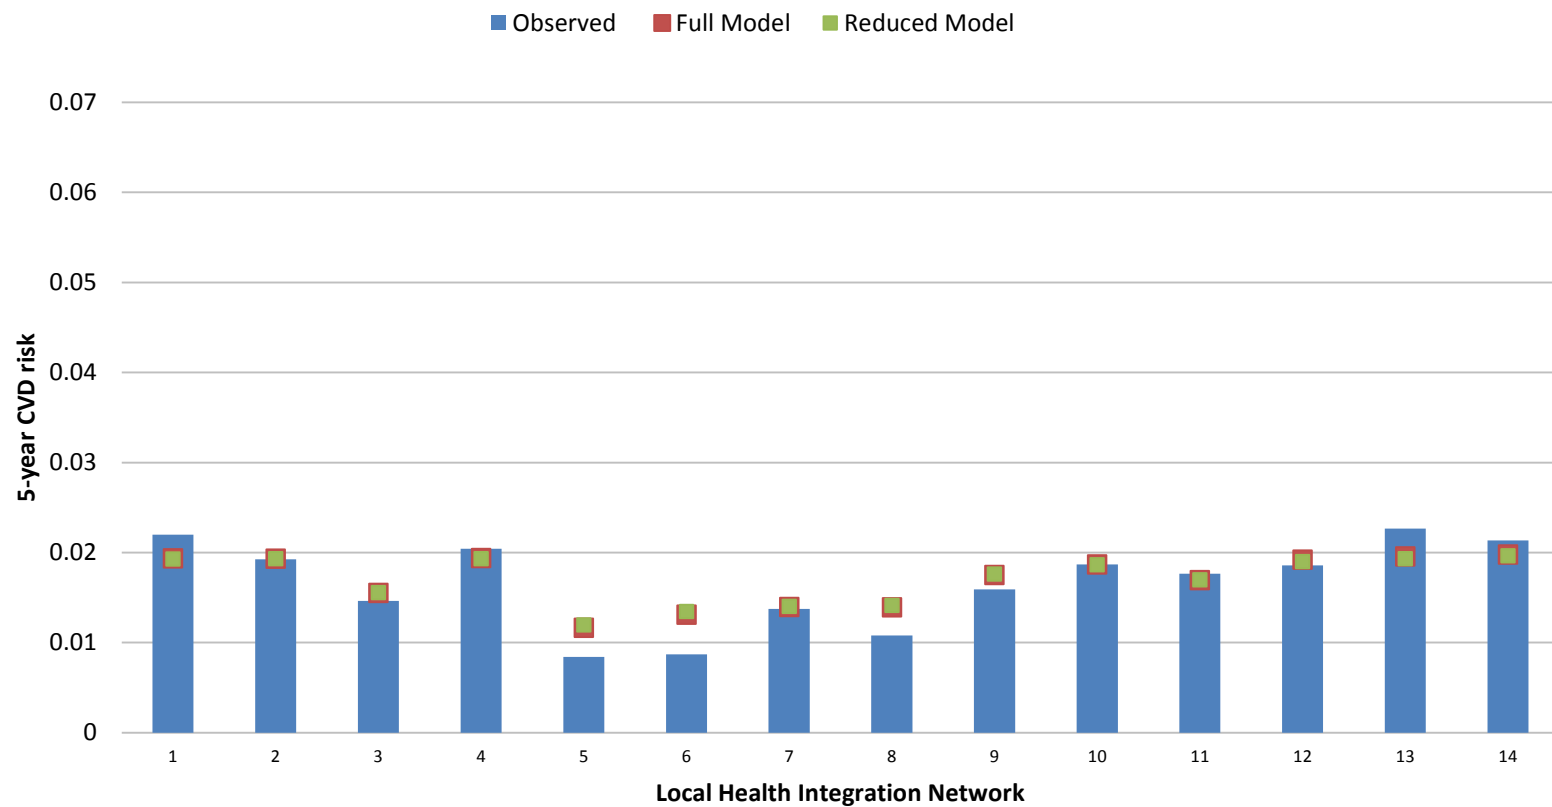

Supplement: 170914-res-6-at.pdf [file 170914-res-6-at.pdf]
